# Supplementary material for: Salmonid alphavirus infection causes skin dysbiosis in Atlantic salmon (Salmo salar L.) post-smolts
Source: PubMed Central journal article supplement (PMC5338768; doi:10.1371/journal.pone.0172856), 2017-03-06

**S1 Fig:** Three-dimensional principal coordinate analysis obtained with weighted Unifrac distances of Atlantic salmon microbiome samples that were positive for SAV3 in the heart tissue by qPCR. LD\_D7: low-dose infected day 7; HD\_D7: high-dose infected day 7; HD\_D14: high-dose infected day 14.

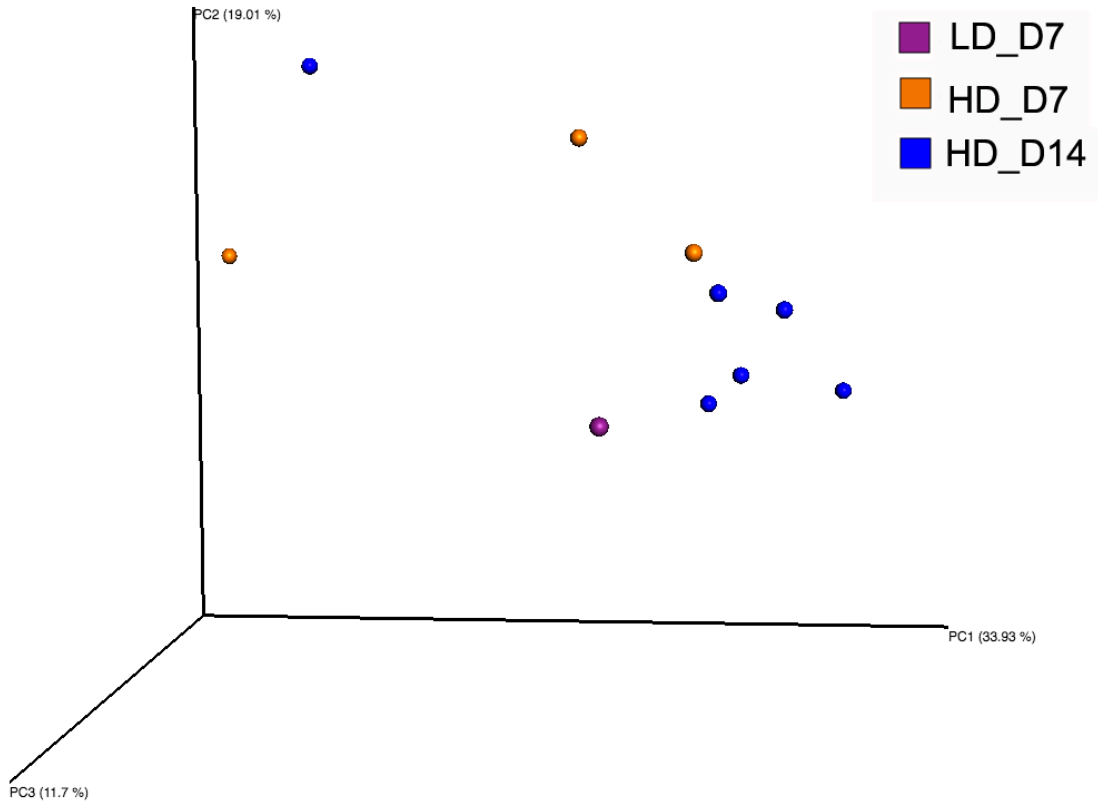

Supplement: pone.0172856.s001.pdf [file pone.0172856.s001.pdf]
